# Supplementary figures and images for: Diversification of multipotential postmitotic mouse retinal ganglion cell precursors into discrete types
Source: eLife journal article supplement (doi:10.7554/elife.73809), 2022-02-22

**a**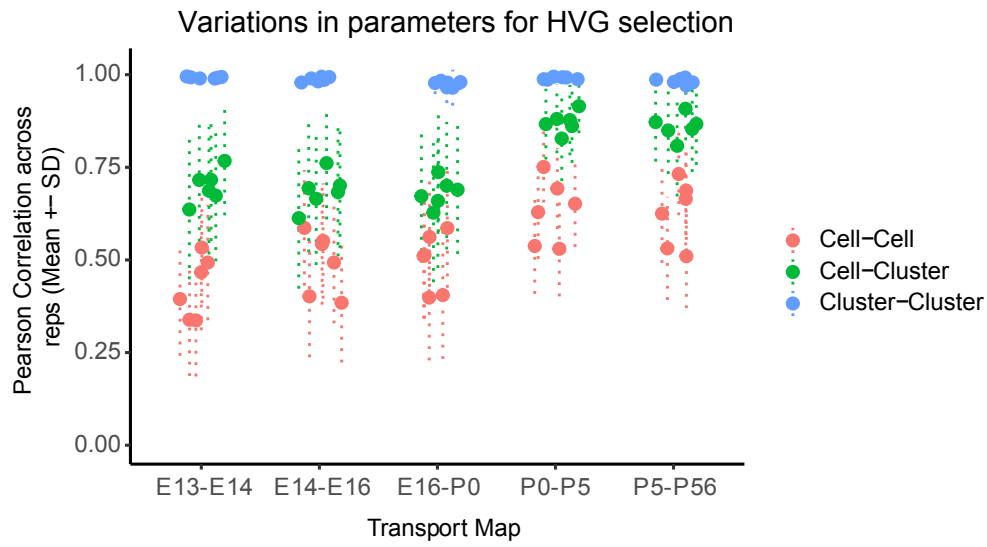**b**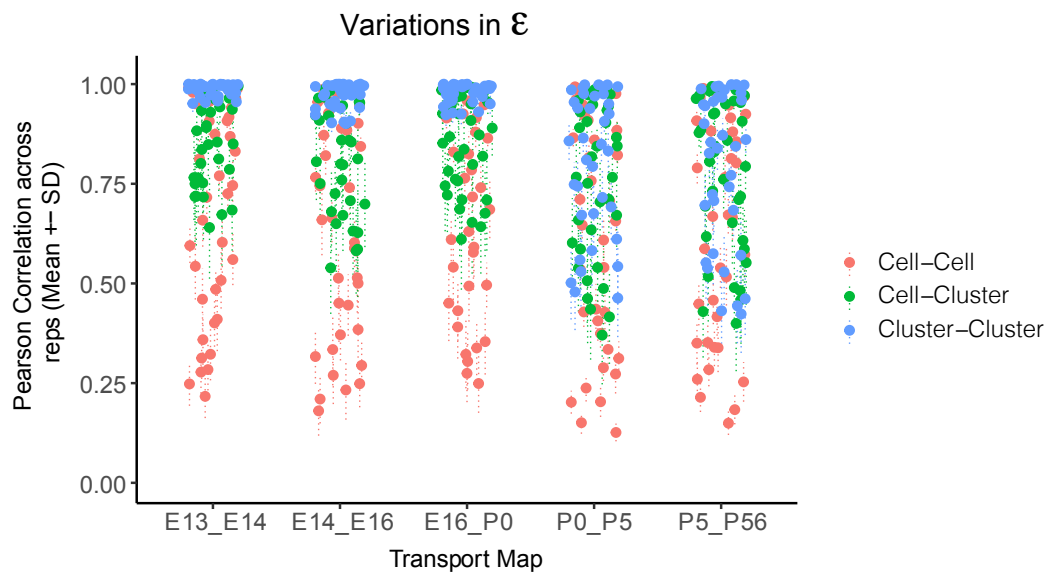**c**

Correlation of transport couplings at the level of clusters

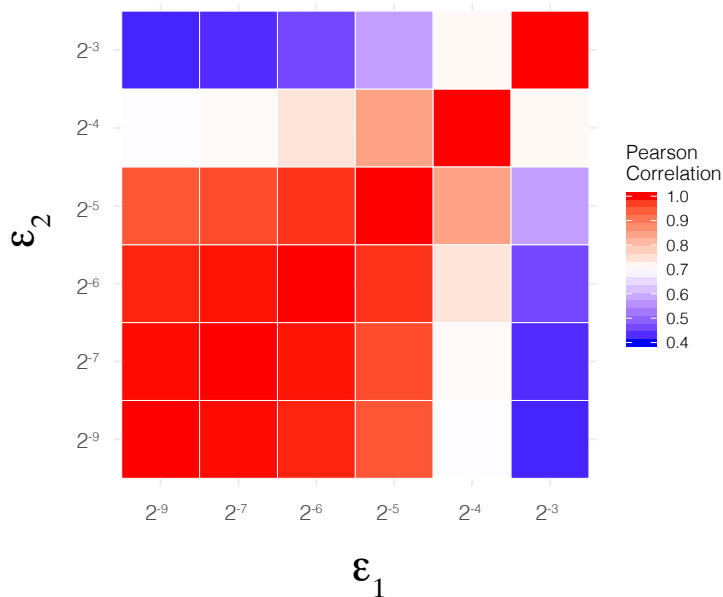

Supplement: supp [file elife-73809-supp-v1.zip]

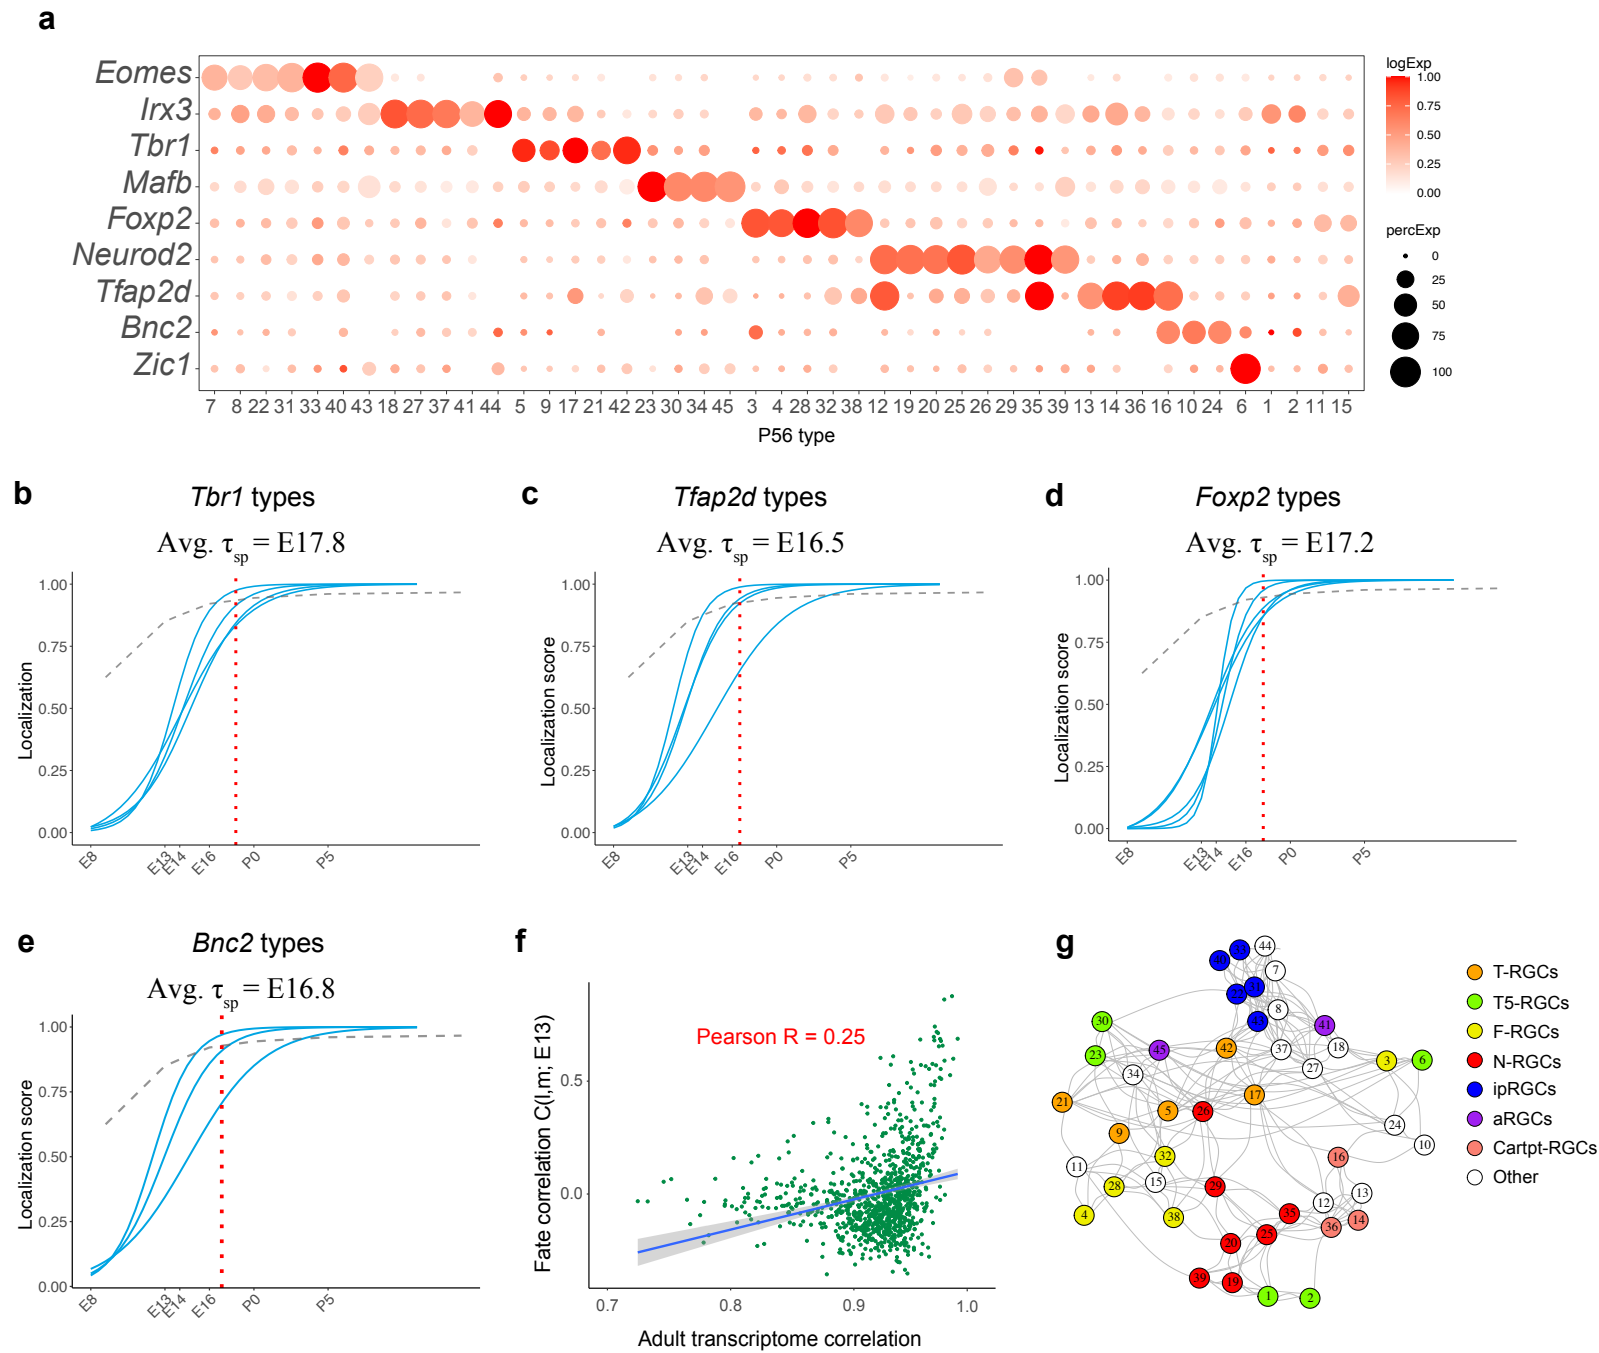

Supplement: supp [file elife-73809-supp-v1.zip]

Supplementary Fig. 3

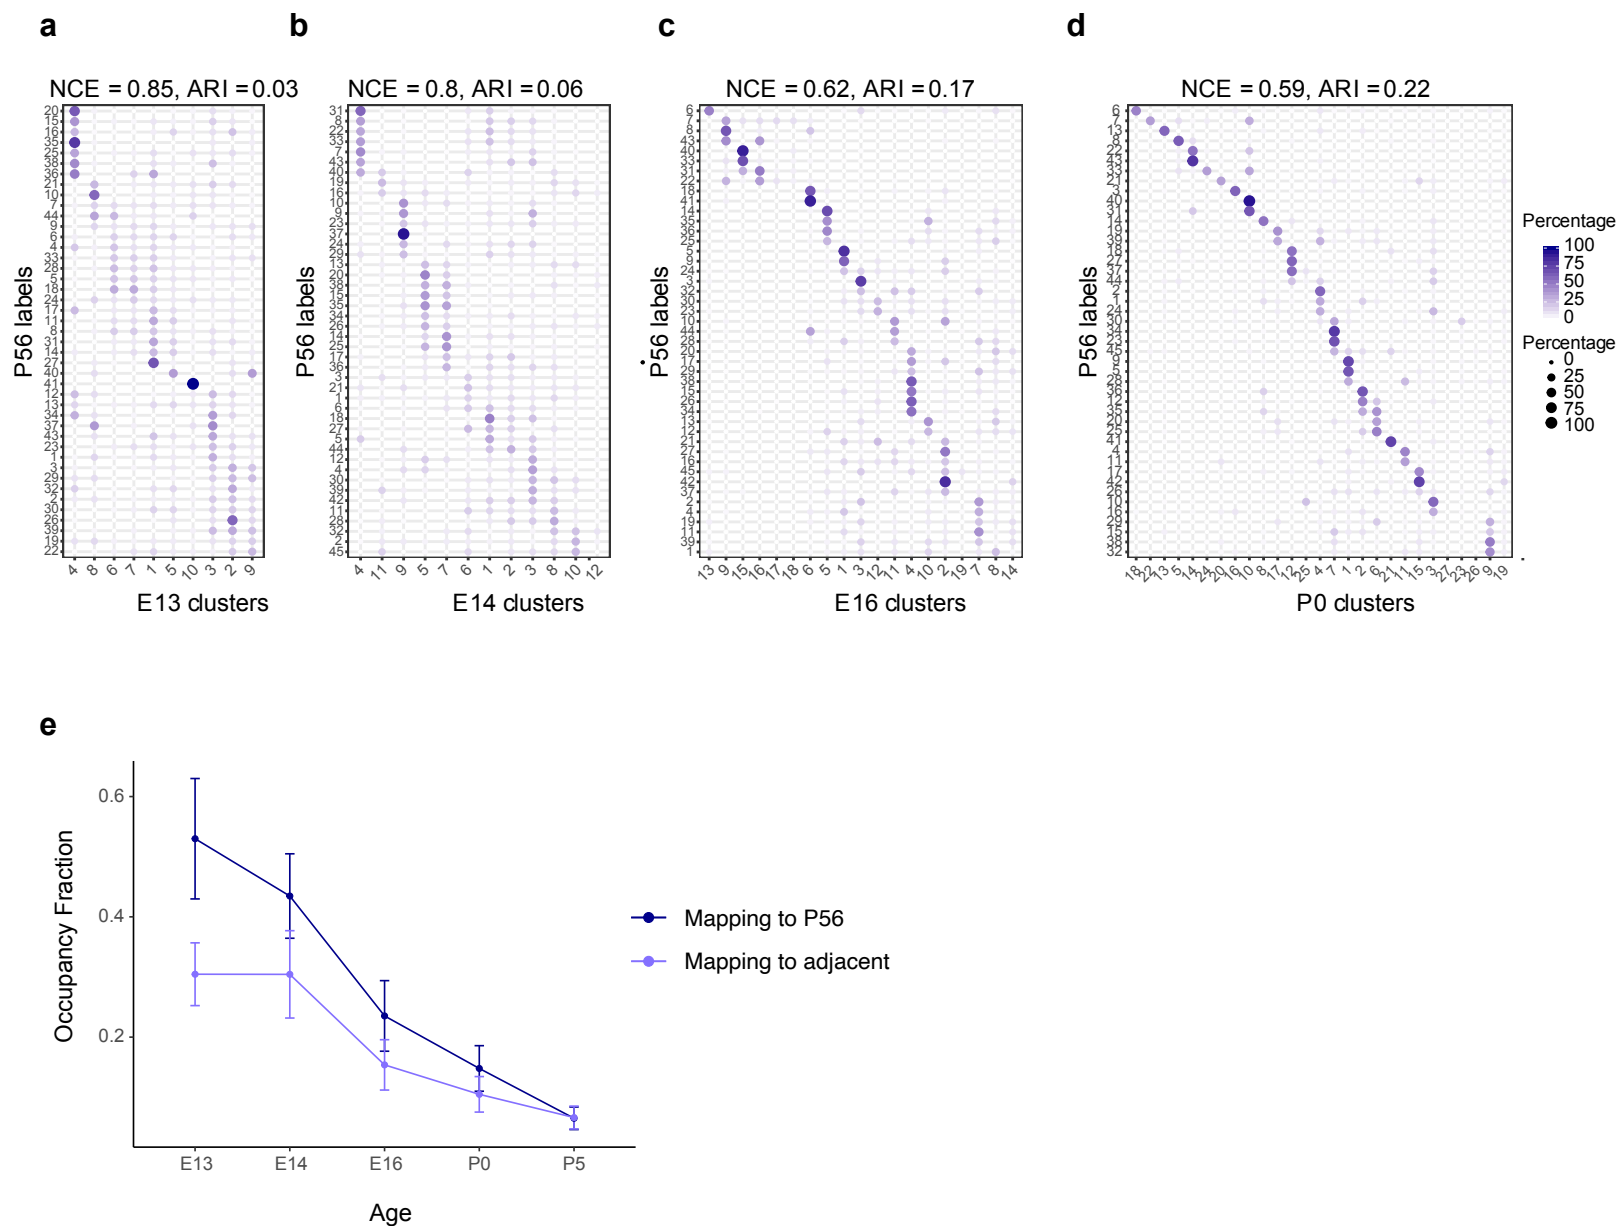

Supplement: supp [file elife-73809-supp-v1.zip]

# Supplementary Figure 6

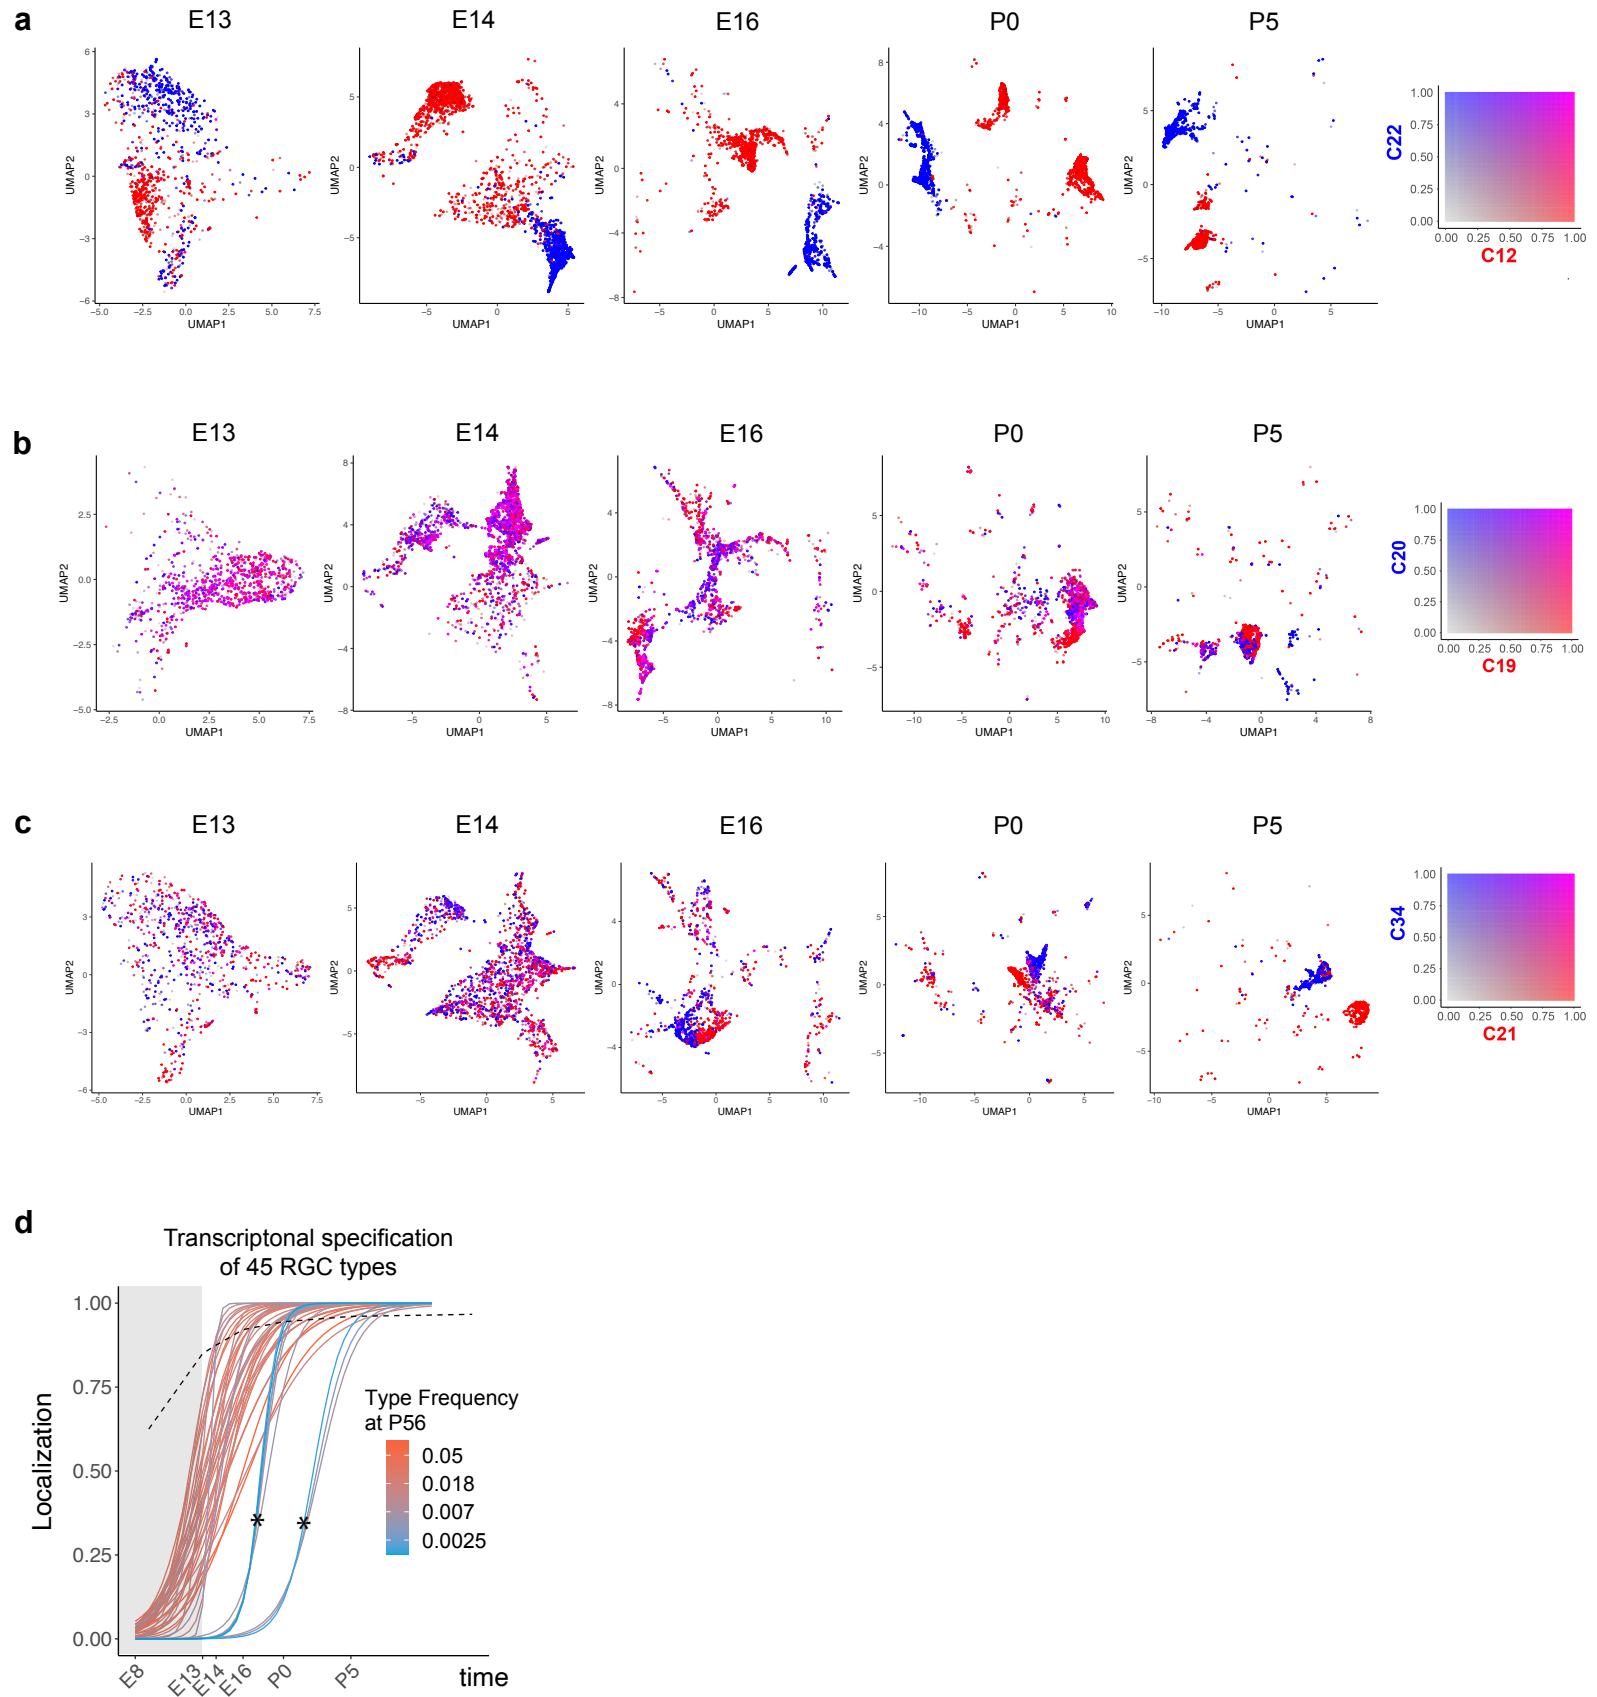

Supplement: supp [file elife-73809-supp-v1.zip]

# Supplementary Fig. 1

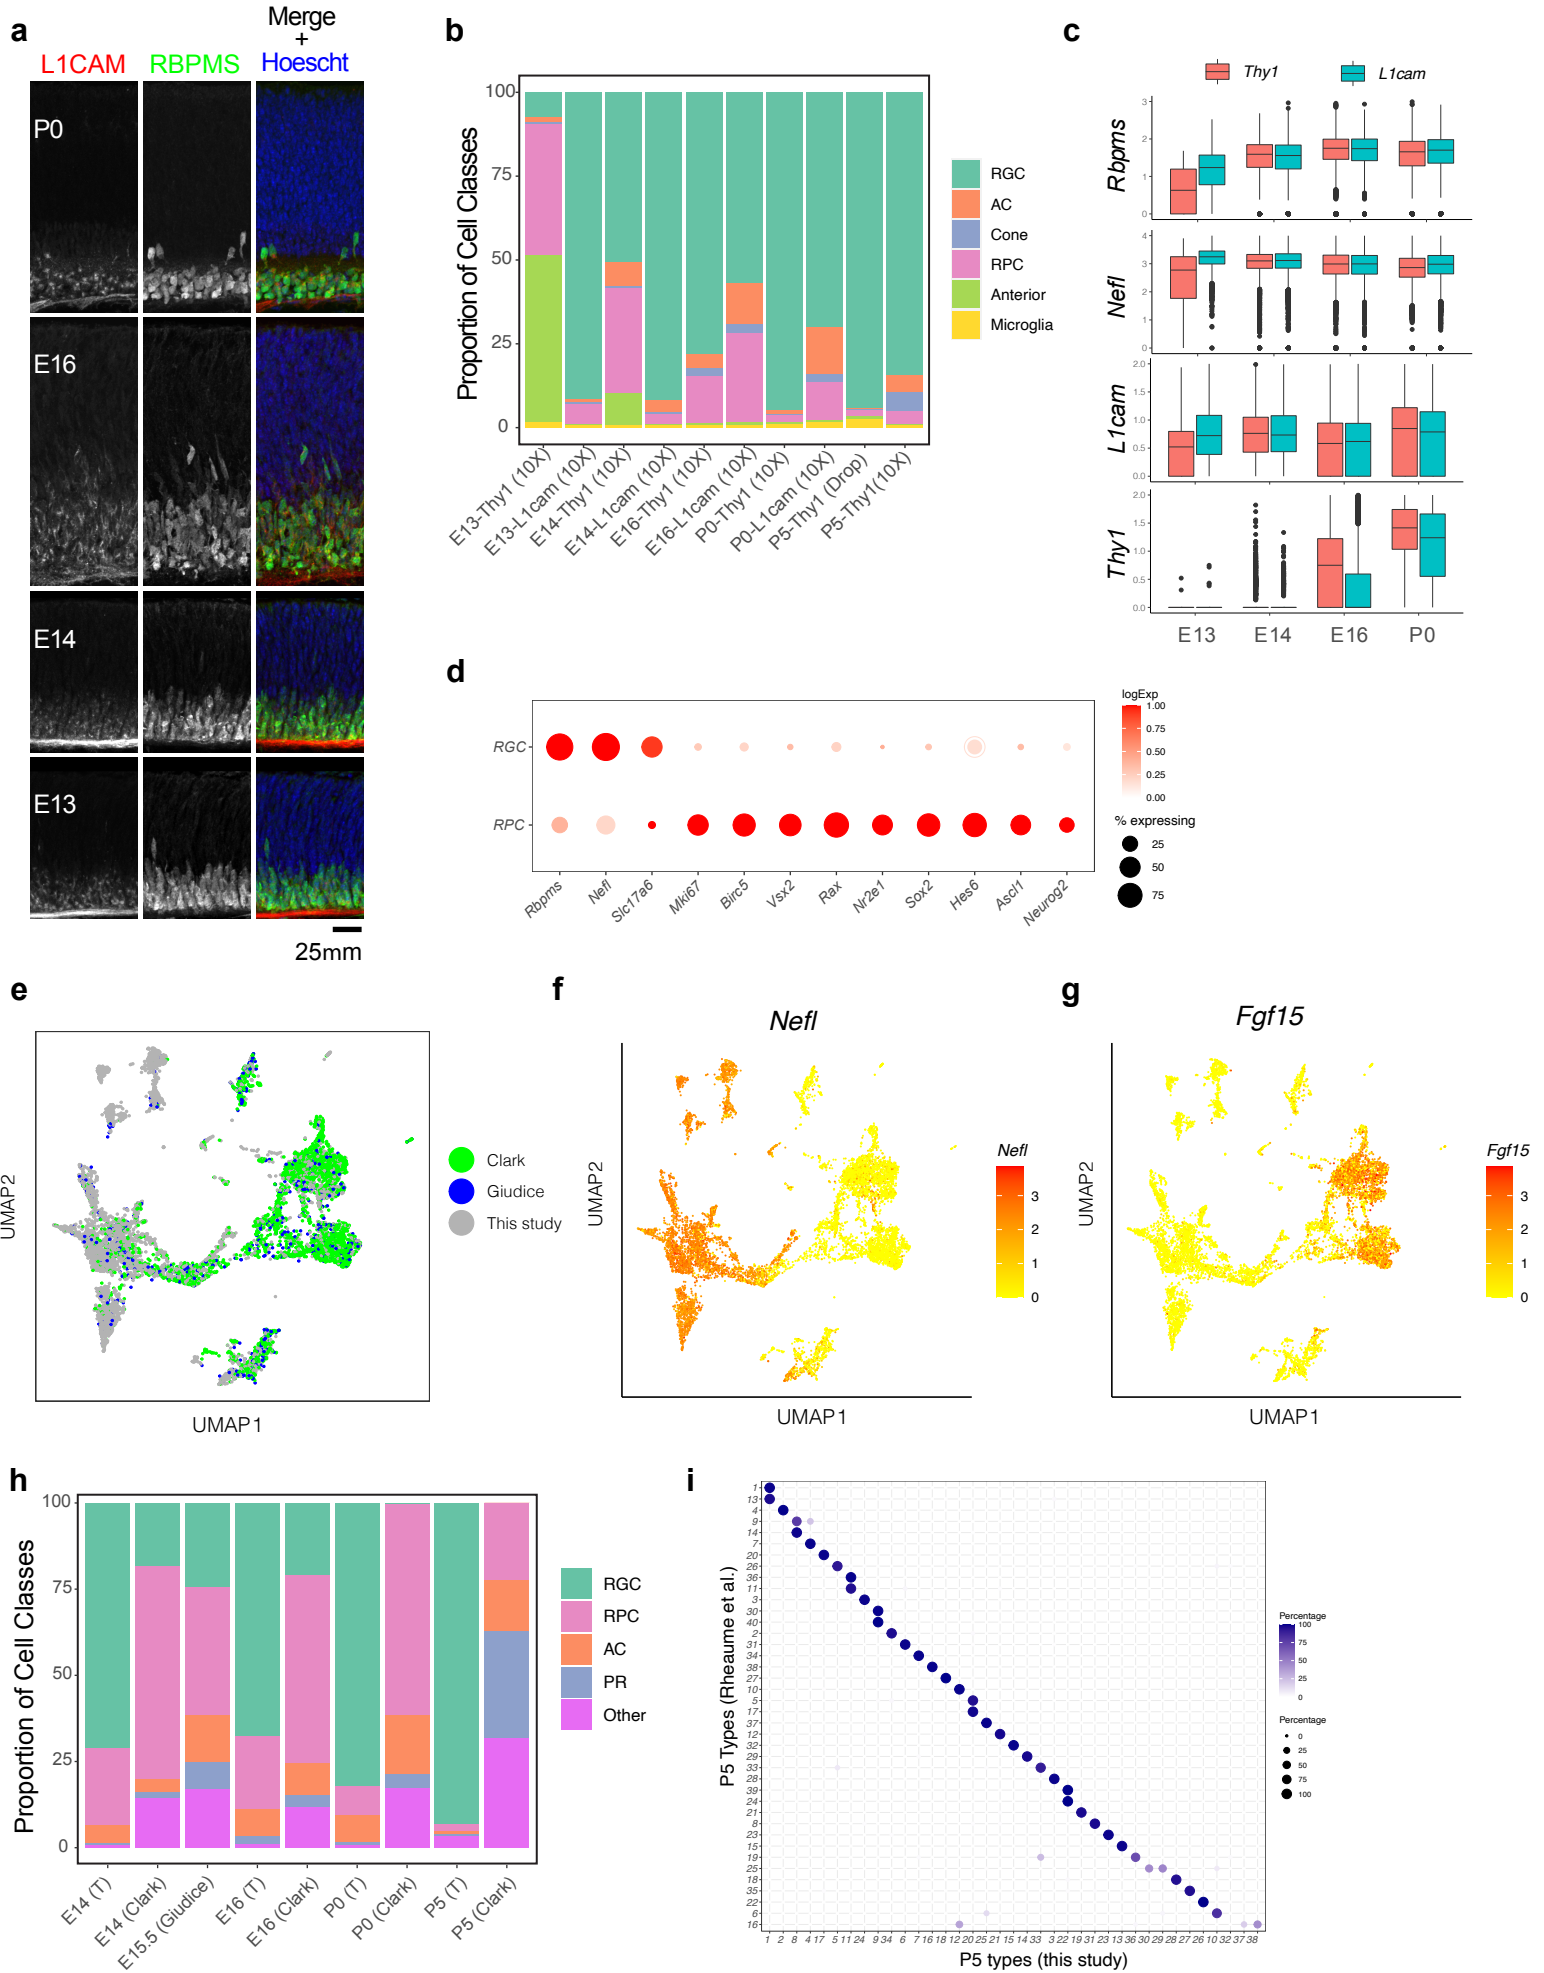

Supplement: supp [file elife-73809-supp-v1.zip]

# Supplementary Fig. 5

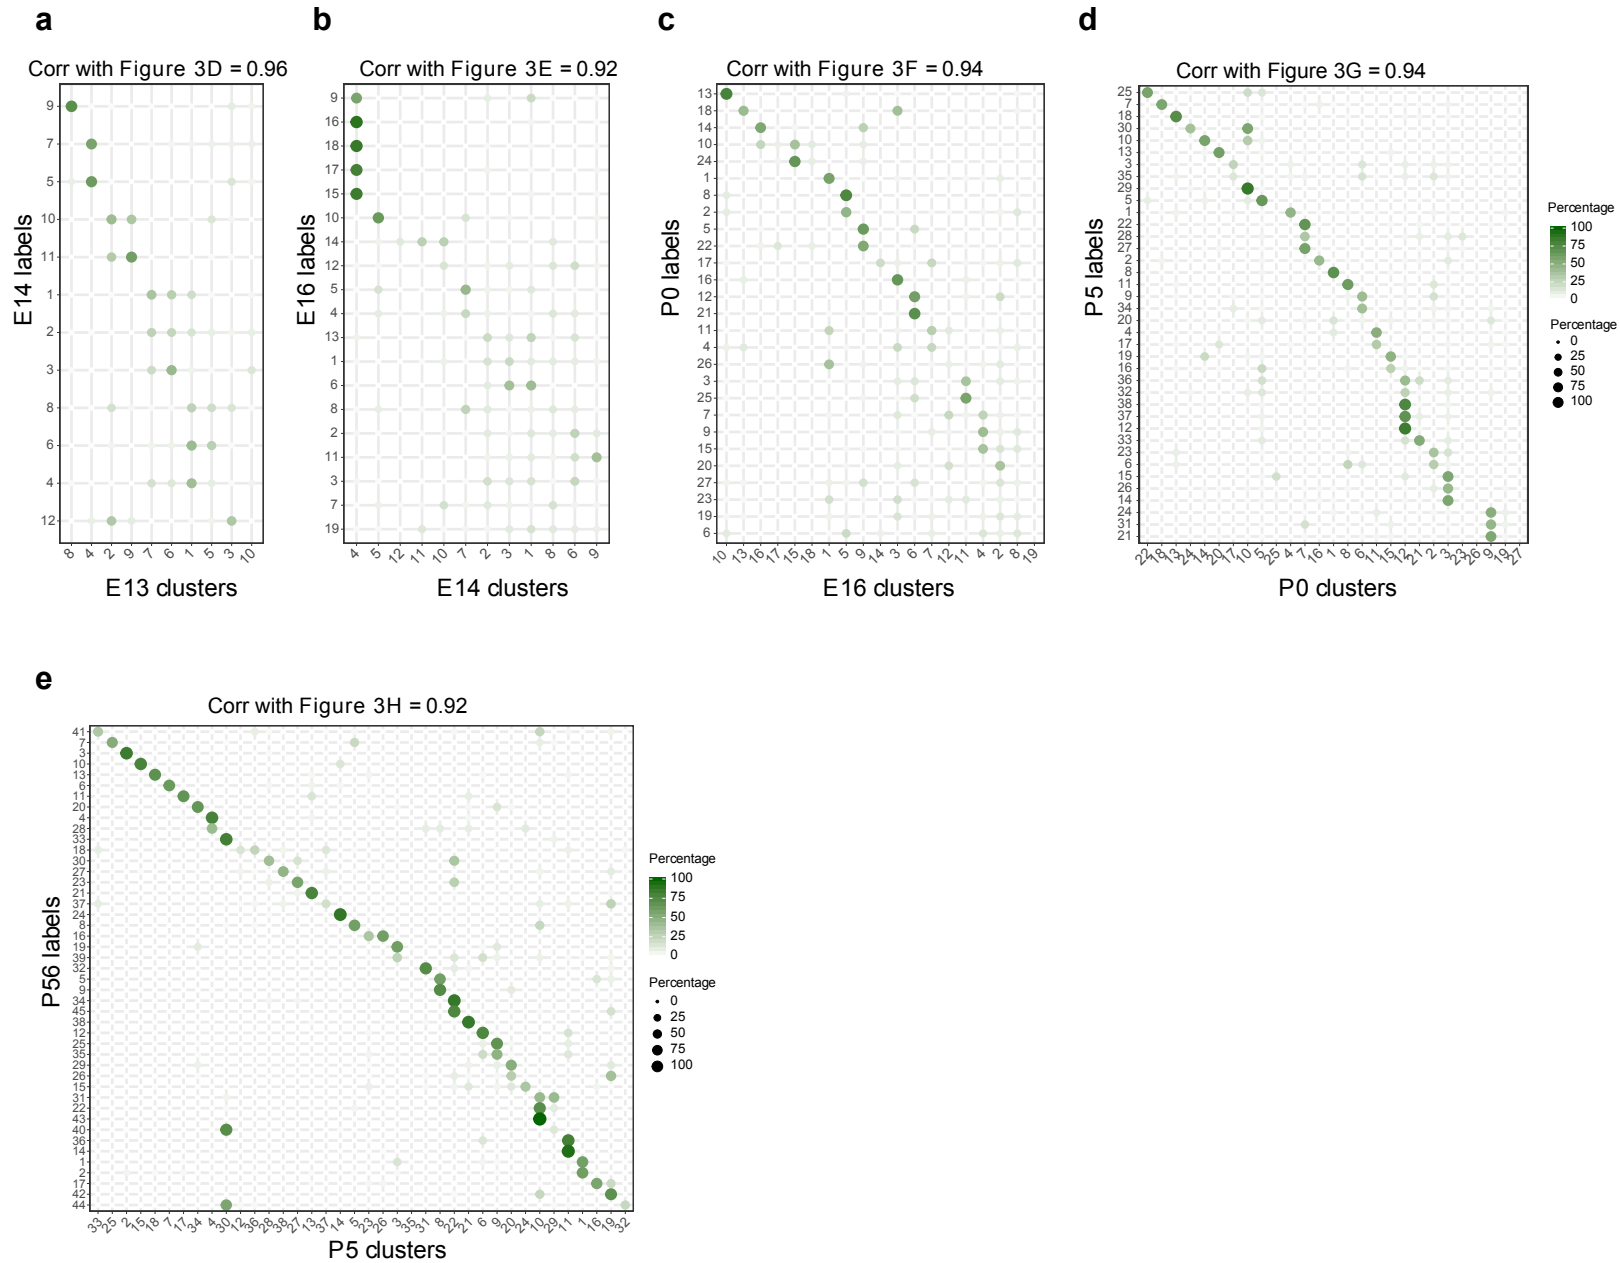

Supplement: supp [file elife-73809-supp-v1.zip]

Supplementary Fig. 2

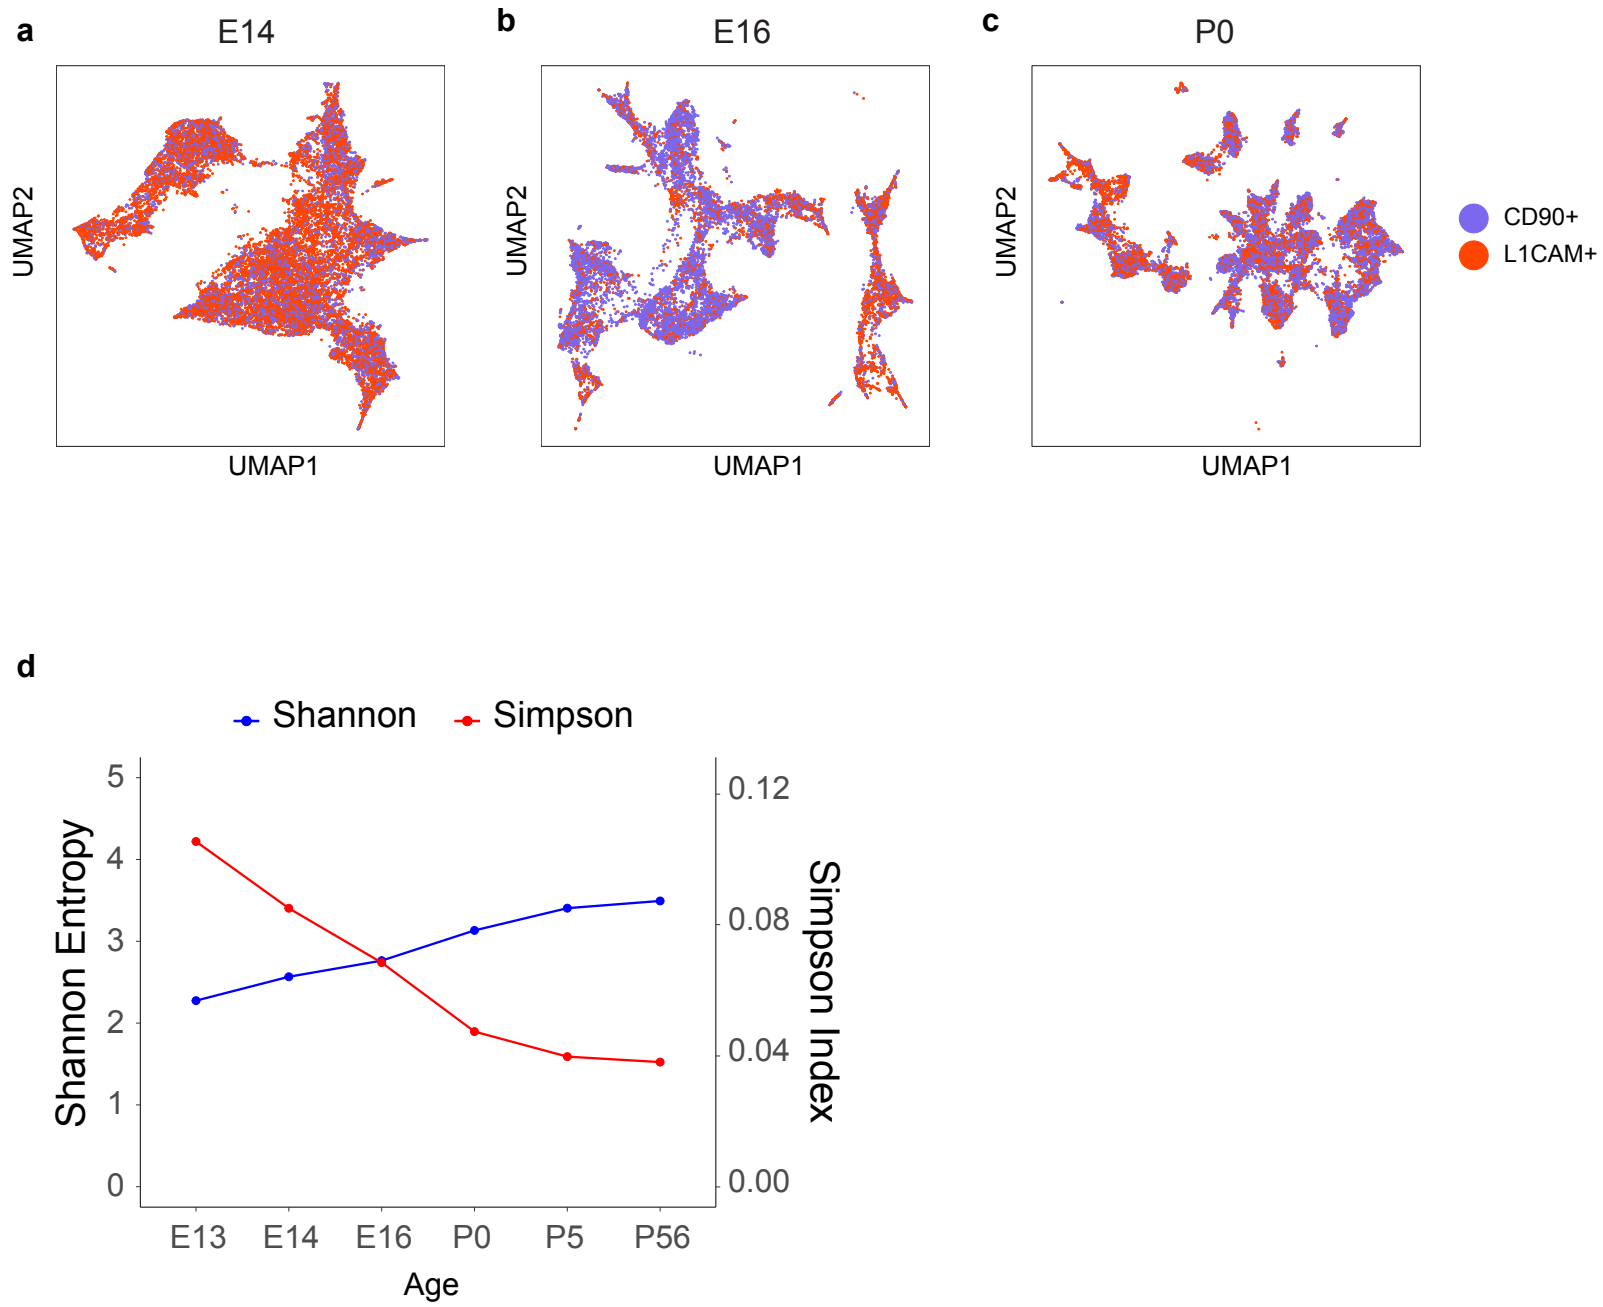

Supplement: supp [file elife-73809-supp-v1.zip]
